# Supplementary material for: Role of Health Professionals Regarding the Impact of Climate Change on Health—An Exploratory Review
Source: Int J Environ Res Public Health. 2021 Mar 20;18(6):3222. doi: 10.3390/ijerph18063222 (PMC8003659; doi:10.3390/ijerph18063222)
Supplement: Supplementary file 1 [file ijerph-18-03222-s001.pdf]

### Supplementary 1. PubMed search strategy

("Climate Change"[Mesh] OR "Environment"[MeSH] OR "Environmental Health"[Mesh:NoExp] OR "Heat Stress Disorders"[MeSH] OR climat\*[tiab] OR "conservation of natural resources"[tiab] OR ecosystem[tiab] OR (environment\*[tiab] AND impact\*[tiab] AND health[tiab]) OR "extreme heat"[tiab] OR "global warming"[tiab] OR greenhouse effect\*[tiab] OR "heat stress"[tiab] OR "sustainable development"[tiab]) AND ("Health Personnel"[MeSH] OR "health personnel"[tiab] OR healthcare provider\*[tiab] OR nurse\*[tw] OR physician\*[tw]) AND ("Role"[Mesh] OR "Communication"[Mesh:NoExp] OR "Implementation Science"[Mesh] OR "Information Literacy"[Mesh] OR "Information Dissemination"[Mesh] OR "Education, Professional"[Mesh] OR "Health Education"[Mesh] OR "consumer health information"[tiab] OR "information dissemination"[tiab] OR "information literacy"[tiab] OR "nurse's role"[tiab] OR "physician's role"[tiab]) NOT ("Animals"[MeSH] NOT "Humans"[MeSH]) AND (("2000/01/01"[PDAT] : "2020/12/31"[PDAT]))

### Supplementary 2. Full list of articles included in the review

1. Adlong W, Dietsch E. Nursing and climate change: An emerging connection. *Collegian*. 2015;22(1):19–24.
2. Agarwal BB. Journey of the carbon-literate and climate-conscious endosurgeon having a head, heart, hands, and holistic sense of responsibility. *Surg Endosc*. 2008 Dec;22(12):2539–40.
3. Alame D, Truog RD. How Should Clinicians Weigh the Benefits and Harms of Discussing Politicized Topics that Influence Their Individual Patients' Health? *AMA J Ethics*. 2017 Dec 1;19(12):1174–82.
4. Allen CE. The challenges of climate change. *Ala Nurse*. 2009 Feb;36(4):11–6; quiz 17.
5. Armstrong F. Do no harm? Health care and the environment. *Aust Nurs J*. 2005 Feb;12(7):18–21.
6. Auerbach PS. Physicians and the environment. *JAMA*. 2008 Feb 27;299(8):956–8.
7. Barlow G. Nurses feel impact of climate change. *Aust Nurs J*. 2008 May;15(10):24–6.
8. Barna S, Goodman B, Mortimer F. The health effects of climate change: what does a nurse need to know? *Nurse Educ Today*. 2012 Oct;32(7):765–71.
9. Bedsworth L. Preparing for climate change: a perspective from local public health officers in California. *Environ Health Perspect*. 2009 Apr;117(4):617–23.
10. Belkin G. Leadership for the Social Climate. *N Engl J Med*. 2020 May 21;382(21):1975–7.
11. Bell E. Readyng health services for climate change: a policy framework for regional development. *Am J Public Health*. 2011 May;101(5):804–13.
12. Bell EJ. Climate change: what competencies and which medical education and training approaches? *BMC Med Educ*. 2010 Apr 30;10:31.
13. Bhutta ZA, Aimone A, Akhtar S. Climate change and global child health: what can paediatricians do? *Arch Dis Child*. 2019 May;104(5):417–8.
14. Blakemore S. Nurses urged to take a lead in reducing the NHS carbon footprint. *Nurs Stand*. 2009 Feb 4;23(22):12–3.
15. Brucker MC. Nursing the Planet. *Nurs Womens Health*. 2019 Dec;23(6):461–2.
16. Burkle FM. Pandering to ignorance on climate change: lessons from an investment strategist. *Prehosp Disaster Med*. 2013 Jun;28(3):200–1.
17. Butler CD. Lightening our carbon footprint: economics, norms and doctors. *Med J Aust*. 2010

- May 3;192(9):485–6.
18. Butler CD, Harley D. Primary, secondary and tertiary effects of eco-climatic change: the medical response. *Postgrad Med J*. 2010 Apr;86(1014):230–4.
  19. Capon AG, Talley AC NJ, Horton RC. Planetary health: what is it and what should doctors do? *Med J Aust*. 2018 Apr 16;208(7):296–7.
  20. Carr JL, Sheffield PE, Kinney PL. Preparedness for climate change among local health department officials in New York state: a comparison with national survey results. *J Public Health Manag Pract*. 2012 Apr;18(2):E24–32.
  21. Chalupka S, Anderko L. Climate Change and Schools: Implications for Children’s Health and Safety. *Creat Nurs*. 2019 Aug 15;25(3):249–57.
  22. Chenven L, Copeland D. Front-line worker engagement: greening health care, improving worker and patient health, and building better jobs. *New Solut*. 2013 Jan 1;23(2):327–45.
  23. Chivian E. Why doctors and their organisations must help tackle climate change: an essay by Eric Chivian. *BMJ*. 2014 Apr 2;348:g2407.
  24. Cook C, Demorest SL, Schenk E. Nurses and Climate Action. *Am J Nurs*. 2019 Apr;119(4):54–60.
  25. Costello A, Montgomery H, Watts N. Climate change: the challenge for healthcare professionals. *BMJ*. 2013 Oct 9;347:f6060.
  26. Couser G. Emergency medicine and environmental activism. *Emerg Med Australas*. 2004 Dec;16(5–6):469–72.
  27. Cowell JM. Climate Change, School Health and School Nursing: A Call to Action. *J Sch Nurs*. 2019 Dec;35(6):394.
  28. Crowley RA, Health and Public Policy Committee of the American College of Physicians. Climate Change and Health: A Position Paper of the American College of Physicians. *Ann Intern Med*. 2016 May 3;164(9):608–10.
  29. Cruz JP, Felicilda-Reynaldo RFD, Alshammari F, Alquwez N, Alicante JG, Obaid KB, et al. Factors Influencing Arab Nursing Students’ Attitudes toward Climate Change and Environmental Sustainability and their Inclusion in Nursing Curricula. *Public Health Nurs*. 2018 Nov;35(6):598–605.
  30. Demorest S, Spengeman S, Schenk E, Cook C, Weston HL. The Nurses Climate Challenge: A National Campaign to Engage 5,000 Health Professionals Around Climate Change. *Creat Nurs*. 2019 Aug 15;25(3):208–15.
  31. Douglas K. Nurses feel the heat. *Aust Nurs Midwifery J*. 2014 Feb;21(7):20–4.
  32. Dunk JH, Jones DS. Sounding the Alarm on Climate Change, 1989 and 2019. *N Engl J Med*. 2020 Jan 16;382(3):205–7.
  33. Eide P, Odom-Maryon T. Environmental and Climate Change Initiatives in Nursing Education. *Annu Rev Nurs Res*. 2019 Dec 23;38(1):131–44.
  34. Every-Palmer S, McBride S, Berry H, Menkes DB. Climate change and psychiatry. *Aust N Z J Psychiatry*. 2016 Jan;50(1):16–8.
  35. Friedrich MJ. Medical Community Gathers Steam to Tackle Climate’s Health Effects. *JAMA*. 2017 Apr 18;317(15):1511–3.
  36. George M, Bruzzese J-M, Matura LA. Climate Change Effects on Respiratory Health: Implications for Nursing. *J Nurs Scholarsh*. 2017 Nov;49(6):644–52.

37. Gill M, Godlee F, Horton R, Stott R. Doctors and climate change. *BMJ*. 2007 Dec 1;335(7630):1104–5.
38. Gill M, Stott R. Health professionals must act to tackle climate change. *Lancet*. 2009 Dec 12;374(9706):1953–5.
39. Gómez A, Balsari S, Nusbaum J, Heerboth A, Lemery J. Perspective: Environment, biodiversity, and the education of the physician of the future. *Acad Med*. 2013 Feb;88(2):168–72.
40. Goodman B. The need for a “sustainability curriculum” in nurse education. *Nurse Educ Today*. 2011 Nov;31(8):733–7.
41. Gould RM. The physician’s role in efforts to slow global warming. *Am Fam Physician*. 2011 Aug 1;84(3):256–7.
42. Grabow M, Bryan T, Checovich M, Converse A, Middlecamp C, Mooney M, et al. Mindfulness and Climate Change Action: A Feasibility Study. *Sustainability*. 2018 May;10(5).
43. Green EIH, Blashki G, Berry HL, Harley D, Horton G, Hall G. Preparing Australian medical students for climate change. *Aust Fam Physician*. 2009 Sep;38(9):726–9.
44. Guggenheim R. The health threat of climate change: working in partnership with patients. *Br J Gen Pract*. 2016 Mar;66(644):149.
45. Guggenheim R. Bringing the planet into the generalist practice: a form of preventive care. *Lancet Planet Health*. 2018 May;2(5):e200–1.
46. Haines A, Ebi K. The Imperative for Climate Action to Protect Health. *N Engl J Med*. 2019 Jan 17;380(3):263–73.
47. Haines A, Scheelbeek P. The health case for urgent action on climate change. *BMJ*. 2020 Mar 30;368:m1103.
48. Hale I, Hale D, Howard C, Bell W. Time to divest from the fossil-fuel industry. *CMAJ*. 2014 Sep 2;186(12):960.
49. Herman B. Health systems urged to divest fossil-fuel stocks as UK doctors act. *Mod Healthc*. 2014 Aug 4;44(31):8–9.
50. Horton G, Magin P. Healthy patients, healthy planet--green recommendations for GP health promotion. *Aust Fam Physician*. 2007 Dec;36(12):1006–8.
51. Isaacs D. Climate change: The moral role of paediatricians. *J Paediatr Child Health*. 2015 Sep;51(9):843–4.
52. Jay M, Marmot MG. Health and climate change. *Lancet*. 2009 Sep 19;374(9694):961–2.
53. Kadandale S, Marten R, Dalglish SL, Rajan D, Hipgrave DB. Primary health care and the climate crisis. *Bull World Health Organ*. 2020 Nov 1;98(11):818–20.
54. Kefford RF. Medical heat for climate change. *Med J Aust*. 2006 Jun 5;184(11):582.
55. Kemper KJ, Etzel RA. Research about climate advocacy: Directions from a pilot survey of academic pediatricians. *Complement Ther Med*. 2020 Mar;49:102335.
56. Kerr R, Nerbonne JF, Potter T. Sparking a Movement for a Healthy Climate Through Leadership Development. *Creat Nurs*. 2019 Aug 15;25(3):216–21.
57. Khalifian S, Rosenbach M. Dermatology, climate change, and the perils of attacks on expertise. *J Am Acad Dermatol*. 2018 Aug;79(2):397–9.
58. Kiang K, Graham S, Farrant B. Climate change, child health and the role of the paediatric profession in under-resourced settings. *Trop Med Int Health*. 2013 Sep;18(9):1053–6.

59. Kirk M. The impact of globalization and environmental change on health: challenges for nurse education. *Nurse Educ Today*. 2002 Jan;22(1):60–71; discussion 72-75.
60. Kitt-Lewis E, Adam M, Buckland P, Clark D, Hockenberry K, Jankura D, et al. Creating a Generation of Sustainable Nurses: Sustainability Efforts in Nursing Education. *Nurs Clin North Am*. 2020 Mar;55(1):1–10.
61. Kurth AE. Planetary Health and the Role of Nursing: A Call to Action. *J Nurs Scholarsh*. 2017 Nov;49(6):598–605.
62. Ladouceur R. Our fight against climate change. *Can Fam Physician*. 2019 Nov;65(11):766.
63. Laking G, Woodward A, Metcalfe S, Macmillan A, Lindsay G, Santa Barbara J, et al. Climate science, denial and the Declaration of Delhi. *N Z Med J*. 2009 Dec 11;122(1307):84–93.
64. Laustsen G. Greening in healthcare. *Nurs Manage*. 2010 Nov;41(11):26–31.
65. Leffers J, Butterfield P. Nurses play essential roles in reducing health problems due to climate change. *Nurs Outlook*. 2018 Apr;66(2):210–3.
66. Leffers J, Levy RM, Nicholas PK, Sweeney CF. Mandate for the Nursing Profession to Address Climate Change Through Nursing Education. *J Nurs Scholarsh*. 2017 Nov;49(6):679–87.
67. Lopez-Medina IM, Álvarez-Nieto C, Grose J, Elsbernd A, Huss N, Huynen M, et al. Competencies on environmental health and pedagogical approaches in the nursing curriculum: A systematic review of the literature. *Nurse Educ Pract*. 2019 May;37:1–8.
68. MacPherson CC. Time for physicians to take action on climate change. *Acad Med*. 2009 Jul;84(7):817.
69. Macpherson CC, Wynia M. Should Health Professionals Speak Up to Reduce the Health Risks of Climate Change? *AMA J Ethics*. 2017 Dec 1;19(12):1202–10.
70. Madden DL, McLean M, Horton GL. Preparing medical graduates for the health effects of climate change: an Australasian collaboration. *Med J Aust*. 2018 Apr 16;208(7):291–2.
71. Maibach EW, Chadwick A, McBride D, Chuk M, Ebi KL, Balbus J. Climate change and local public health in the United States: preparedness, programs and perceptions of local public health department directors. *PLoS One*. 2008 Jul 30;3(7):e2838.
72. Maibach EW, Kreslake JM, Roser-Renouf C, Rosenthal S, Feinberg G, Leiserowitz AA. Do Americans Understand That Global Warming Is Harmful to Human Health? Evidence From a National Survey. *Ann Glob Health*. 2015 Jun;81(3):396–409.
73. Maibach EW, Sarfaty M, Mitchell M, Gould R. Limiting global warming to 1.5 to 2.0°C-A unique and necessary role for health professionals. *PLoS Med*. 2019 May;16(5):e1002804.
74. McCarthy G, Bernstein A. Combating EPA Rollbacks - Health Care's Response to a Retreat on Climate. *N Engl J Med*. 2019 Aug 22;381(8):696–8.
75. McCartney G, Hanlon P. What can health professionals contribute to the challenge of sustainability? *Public Health*. 2009 Dec;123(12):761–4.
76. McCartney PR. Climate change and child health. *MCN Am J Matern Child Nurs*. 2007 Aug;32(4):255.
77. McDermott RA. The carbon footprints of obesity, chronic disease and population growth: four things doctors can do. *Med J Aust*. 2010 May 3;192(9):531–2.
78. McDermott-Levy R, Jackman-Murphy KP, Leffers JM, Jordan L. Integrating Climate Change Into Nursing Curricula. *Nurse Educ*. 2019 Feb;44(1):43–7.

79. Mehta A. Physicians' contribution to climate change. *CMAJ*. 2009 May 26;180(11):1176.
80. Melamed A, Jackson N. Nursing and environmental health. *Health Prog*. 2003 Dec;84(6):29–32, 53.
81. Mendes A. Greener treatments: the NHS carbon footprint. *Br J Community Nurs*. 2019 May 2;24(5):248–9.
82. Metcalfe S, Woodward A, Macmillan A, Baker M, Howden-Chapman P, Lindsay G, et al. Why New Zealand must rapidly halve its greenhouse gas emissions. *N Z Med J*. 2009 Oct 9;122(1304):72–95.
83. Morgan RE. Determined Action to Tackle Health Determinants: A Collaborative Response to the Challenge of Climate Change Mitigation in Practice Settings. *Creat Nurs*. 2019 Aug 15;25(3):195–200.
84. Morrison L. Viewpoint: Doctors and Extinction Rebellion. *Br J Gen Pract*. 2019 Jul;69(684):344.
85. Neal-Boylan L, Breakey S, Nicholas PK. Integrating Climate Change Topics Into Nursing Curricula. *J Nurs Educ*. 2019 Jun 1;58(6):364–8.
86. Nicholas PK, Breakey S. Climate Change, Climate Justice, and Environmental Health: Implications for the Nursing Profession. *J Nurs Scholarsh*. 2017 Nov;49(6):606–16.
87. O'Day T, Wallace C. Members take action to reduce effects of climate change. *Am Nurse*. 2015 Oct;47(5):13.
88. Parker CL. Slowing global warming: benefits for patients and the planet. *Am Fam Physician*. 2011 Aug 1;84(3):271–8.
89. Parker CL, Wellbery CE, Mueller M. The Changing Climate: Managing Health Impacts. *Am Fam Physician*. 2019 Nov 15;100(10):618–26.
90. Patil M, Jeffery KJ. What does climate change mean for occupational health professionals? *Occup Med (Lond)*. 2020 Sep 9;70(6):386–8.
91. Patrick K. Physicians and climate change policy: we are powerful agents of change. *CMAJ*. 2015 Mar 17;187(5):307.
92. Patrick R, Capetola T. It's here! Are we ready? Five case studies of health promotion practices that address climate change from within Victorian health care settings. *Health Promot J Austr*. 2011 Dec;22 Spec No:S61-67.
93. Phipps R, Macmillan A, Metcalfe S, Mansoor O, Lindsay G, Metcalfe S, et al. Sign On--prescribing for climate health. *N Z Med J*. 2009 Oct 30;122(1305):106–8.
94. Phipps R, Randerson R, Blashki G. The climate change challenge for general practice in New Zealand. *N Z Med J*. 2011 Apr 29;124(1333):47–54.
95. Potter T. Planetary Health: The Next Frontier in Nursing Education. *Creat Nurs*. 2019 Aug 15;25(3):201–7.
96. Rabinowitz PM, Natterson-Horowitz BJ, Kahn LH, Kock R, Pappaioanou M. Incorporating one health into medical education. *BMC Med Educ*. 2017 Feb 23;17(1):45.
97. Rao M. What's good for the climate is good for health: the role of doctors in addressing climate change. *Natl Med J India*. 2010 Feb;23(1):1–3.
98. Rice MB. Climate change at the bedside? Observations from an ATS membership survey. *Ann Am Thorac Soc*. 2015 Feb;12(2):245–6.
99. Ring W. Inspire Hope, Not Fear: Communicating Effectively About Climate Change and

- Health. *Ann Glob Health*. 2015 Jun;81(3):410–5.
100. Roberts I, Stott R, Climate and Health Council executive. Doctors and climate change. *BMJ*. 2010 Nov 17;341:c6357.
  101. Rogers W. Moral responsibility in medicine: where are the boundaries? *Lancet*. 2020 Aug 8;396(10248):373–4.
  102. Rosenblatt RA. Ecological change and the future of the human species: can physicians make a difference? *Ann Fam Med*. 2005 Apr;3(2):173–6.
  103. Sarfaty M, Abouzaid S. The physician's response to climate change. *Fam Med*. 2009 May;41(5):358–63.
  104. Sarfaty M, Bloodhart B, Ewart G, Thurston GD, Balmes JR, Guidotti TL, et al. American Thoracic Society member survey on climate change and health. *Ann Am Thorac Soc*. 2015 Feb;12(2):274–8.
  105. Sarfaty M, Kreslake J, Ewart G, Guidotti TL, Thurston GD, Balmes JR, et al. Survey of International Members of the American Thoracic Society on Climate Change and Health. *Ann Am Thorac Soc*. 2016 Oct;13(10):1808–13.
  106. Sayre L, Rhazi N, Carpenter H, Hughes NL. Climate change and human health: the role of nurses in confronting the issue. *Nurs Adm Q*. 2010 Dec;34(4):334–42.
  107. Schachtel A, Boos MD. Pediatric dermatology and climate change: An argument for the pediatric subspecialist as public health advocate. *Pediatr Dermatol*. 2019 Jul;36(4):564–6.
  108. Schwartz BS, Parker C, Glass TA, Hu H. Global environmental change: what can health care providers and the environmental health community do about it now? *Environ Health Perspect*. 2006 Dec;114(12):1807–12.
  109. Schwerdtle P. Nurse initiated hospital greening. *Aust Nurs Midwifery J*. 2015 Aug;23(2):32.
  110. Sendall MC, Lidstone J, Fleming M, Domocol M. Nurses and teachers: partnerships for green health promotion. *J Sch Health*. 2013 Jul;83(7):508–13.
  111. Sheffield PE, Durante KT, Rahona E, Zarcadoolas C. Emerging roles of health care providers to mitigate climate change impacts: a perspective from East Harlem, New York. *Health Hum Rights*. 2014 Jun 14;16(1):113–21.
  112. Shelton CL, McBain SC, Mortimer F, White SM. A new role for anaesthetists in environmentally-sustainable healthcare. *Anaesthesia*. 2019 Sep;74(9):1091–4.
  113. Shumer D. Doctor as environmental steward. *Wilderness Environ Med*. 2009;20(1):91.
  114. Sibbald B. Physicians' roles on the front line of climate change. *CMAJ*. 2013 Feb 19;185(3):195.
  115. Singleton JA, Lau ETL, Nissen LM. Waiter, there is a drug in my soup - using Leximancer® to explore antecedents to pro-environmental behaviours in the hospital pharmacy workplace. *Int J Pharm Pract*. 2018 Aug;26(4):341–50.
  116. Solomon CG, LaRocque RC. Climate Change - A Health Emergency. *N Engl J Med*. 2019 Jan 17;380(3):209–11.
  117. Storz MA, Heymann EP. USA withdrawal from Paris climate agreement: requiring unity among physicians worldwide more than ever before? *Intern Med J*. 2017 Oct;47(10):1218–9.
  118. Storz MA. Mitigating climate change: using the physician's tool of the trade. *Br J Gen Pract*. 2019 Nov;69(688):557.
  119. Sullivan-Marx E, McCauley L. Climate Change, Global Health, and Nursing Scholarship. *J*

- Nurs Scholarsh. 2017 Nov;49(6):593–5.
120. Swartz MK. Taking on Climate Change Through a Health Care Lens. *J Pediatr Health Care*. 2019 Dec;33(6):623.
  121. Teherani A, Nishimura H, Apatira L, Newman T, Ryan S. Identification of core objectives for teaching sustainable healthcare education. *Med Educ Online*. 2017;22(1):1386042.
  122. Thompson M. Health implications of climate change. *Oreg Nurse*. 2004 Sep;69(3):13.
  123. Tran V, Humphrey K, Cobbett J. Climate corrosion: Heroes wanted - Enquire within. *Emerg Med Australas*. 2019 Apr;31(2):271–3.
  124. Ulhøi JP, Ulhøi BP. Beyond climate focus and disciplinary myopia. The roles and responsibilities of hospitals and healthcare professionals. *Int J Environ Res Public Health*. 2009 Mar;6(3):1204–14.
  125. Valentine-Maher SK, Butterfield PG, Laustsen G. Environmental Health: Advancing Emancipatory Policies for the Common Good. *ANS Adv Nurs Sci*. 2018 Mar;41(1):57–69.
  126. Valois P, Blouin P, Ouellet C, Renaud J-S, Bélanger D, Gosselin P. The Health Impacts of Climate Change: A Continuing Medical Education Needs Assessment Framework. *J Contin Educ Health Prof*. 2016;36(3):218–25.
  127. Voelker R. Climate change puts children in jeopardy. *JAMA*. 2009 Jun 3;301(21):2197–9.
  128. Vogel L. Global physician groups call on profession to address environmental health threats. *CMAJ*. 2019 Mar 25;191(12):E346.
  129. Völker M, Hunchangsith P. Drivers of Physicians' Engagement in Addressing Eco-health Problems. *Ecohealth*. 2018 Dec;15(4):853–63.
  130. Walden J, Wenzel L. Beyond Climate Change: Why Medical Institutions Should Divest From Fossil Fuels. *N C Med J*. 2016 Apr;77(2):146.
  131. Wasco JJ. Strategies for Teaching Online RN-to-BSN Students the Health Impacts of Climate Change. *Creat Nurs*. 2019 Aug 15;25(3):e1–8.
  132. Wellbery CE. Climate Change Health Impacts: A Role for the Family Physician. *Am Fam Physician*. 2019 Nov 15;100(10):602–3.
  133. Wellbery C, Sheffield P, Timmireddy K, Sarfaty M, Teherani A, Fallar R. It's Time for Medical Schools to Introduce Climate Change Into Their Curricula. *Acad Med*. 2018 Dec;93(12):1774–7.
  134. While A. Climate change should matter to nurses. *Br J Community Nurs*. 2006 Oct;11(10):454.
  135. Wilson L, Black D, Veitch C. Heatwaves and the elderly - The role of the GP in reducing morbidity. *Aust Fam Physician*. 2011 Aug;40(8):637–40.
  136. Xie E, de Barros EF, Abelsohn A, Stein AT, Haines A. Challenges and opportunities in planetary health for primary care providers. *Lancet Planet Health*. 2018 May;2(5):e185–7.
  137. Emerging Leaders Tackling the Challenges of Environmental Health. *Creat Nurs*. 2019 Nov 1;25(4):270–4.
